# Supplementary material for: Testing DSM-5 in Routine Clinical Practice Settings: Feasibility and Clinical Utility
Source: Atypon-hosted journal article supplement (doi:10.1176/appi.ps.201300098), 2013-07-15
Supplement: 952_ds001.pdf [file 952_ds001.pdf]

Appendix Table 1. **Select Changes in Diagnostic Criteria for Categorical Diagnoses in DSM-5**

| DSM-5 Diagnosis           | Select Changes in Diagnostic Criteria                                                                                                                                                                                                                                                                                                                                                                                                                                                                                                                                                             |
|---------------------------|---------------------------------------------------------------------------------------------------------------------------------------------------------------------------------------------------------------------------------------------------------------------------------------------------------------------------------------------------------------------------------------------------------------------------------------------------------------------------------------------------------------------------------------------------------------------------------------------------|
| Autism Spectrum Disorder  | <ul style="list-style-type: none"> <li>• A single spectrum diagnosis (autism spectrum disorder) replaces autistic disorder, Asperger disorder, and pervasive developmental disorder not otherwise specified               <ul style="list-style-type: none"> <li>- Now differentiated from social communication disorder by presence of the restrictive and repetitive behavior criterion</li> </ul> </li> <li>• Addition of specifier for all neurodevelopmental disorders, “associated with known medical or genetic condition, or environmental factor”</li> </ul>                             |
| Schizophrenia             | <ul style="list-style-type: none"> <li>• Elimination of special treatment of bizarre delusions and “special” hallucinations in Criterion A (characteristic symptoms)</li> <li>• Clarification of negative symptoms in Criterion A (i.e., “restricted affect or avolition/asociality” changed from “affective flattening, alogia, or avolition”)</li> <li>• At least one of two required symptoms to meet Criterion A must be delusions, hallucinations, or disorganized speech</li> <li>• Deletion of subtypes</li> </ul>                                                                         |
| Bipolar Disorder          | <ul style="list-style-type: none"> <li>• Inclusion of increased energy/activity as a Criterion A symptom of hypomania/mania</li> <li>• Addition of mixed features specifier proposal for manic, hypomanic, and major depressive episode</li> </ul>                                                                                                                                                                                                                                                                                                                                                |
| Major Depressive Disorder | <ul style="list-style-type: none"> <li>• Elimination of the bereavement exclusion               <ul style="list-style-type: none"> <li>- Addition of criteria note that the presence of a major depressive episode can be considered in addition to the normal response to a significant loss</li> <li>- Addition of footnote that offers explanatory information about the difference between bereavement and major depressive episode</li> </ul> </li> <li>• Addition of anxious distress specifier for major depressive episode</li> </ul>                                                     |
| PTSD                      | <ul style="list-style-type: none"> <li>• Clarified the definition of a “traumatic event”</li> <li>• Various criteria changes               <ul style="list-style-type: none"> <li>- Criteria C focused on avoidance; Criteria D focused on negative cognitions and mood</li> <li>- Addition of Criteria D3 (persistent distorted blame of self or others) and D4 (persistent negative emotional state)</li> </ul> </li> <li>• Removal of acute vs. chronic specifier; addition of dissociative subtype</li> <li>• Addition of separate criteria set for PTSD in preschool-age children</li> </ul> |
| Substance Use Disorders   | <ul style="list-style-type: none"> <li>• Consolidate substance abuse with substance dependence into a single disorder called substance use disorder               <ul style="list-style-type: none"> <li>- Create a continuum that includes mild, moderate, or severe substance use</li> </ul> </li> <li>• Removal of one of the DSM-IV abuse criteria, and addition of a new criterion, to the new substance use disorder diagnosis               <ul style="list-style-type: none"> <li>- Removal of legal consequences (e.g., multiple arrests)</li> </ul> </li> </ul>                         |

|                       | - Addition of craving                                                                                                                                                                                                                                                                                                                                                                                                                                                                                                                                               |
|-----------------------|---------------------------------------------------------------------------------------------------------------------------------------------------------------------------------------------------------------------------------------------------------------------------------------------------------------------------------------------------------------------------------------------------------------------------------------------------------------------------------------------------------------------------------------------------------------------|
| Personality disorders | <ul style="list-style-type: none"><li>• Section III will include a trait-based diagnostic approach for personality disorders that separates functional impairment (A criteria) and the expression of characteristic traits (B criteria) for the 6 personality disorders that were studied in the field trials.</li><li>• A more flexible trait-specified profile can also be used for patient presentations that do not conform to the 6 types.</li><li>• A final decision was made to retain all 10 DSM-IV personality disorders in Section II of DSM-5.</li></ul> |
